# Supplementary material
Source: Research Square preprint supplement (doi:10.21203/rs.3.rs-9736511/v1)
Supplement: Supplementary file 1 [file b493a6881685308b60282bbb.docx]

**TRANSKRIP WAWANCARA PENELITIAN**

***STUDY INTERVIEW TRANSCRIPT***

***Disclaimer****: We only included unique questions and/or answers from the interviewee, hence not all of the transcripts were made available.*

**Informan 1: UMKM**

***#1st Informant: MSME (Micro, Small, and Medium Enterprise) owner***

**Kode Informan:** I-01 (Pak Uda) ***| Informant code:*** *I-01 (Mr. Uda)*

**Pekerjaan:** Pelaku UMKM Aruk ***| Occupation:*** *An MSME business owner in Aruk*

**Tanggal:** 15 Februari 2025 ***| Date:*** *15th Feb, 2025*

**Waktu:** 09.15–10.05 WIB ***| Time:*** *09.15–10.05 GMT+7*

**Lokasi:** Warung Kopi Aruk, Kecamatan Sajingan Besar, Aruk ***| Location:*** *Aruk Coffee Shop, Sajingan Besar Subdistrict, Aruk*

**Pertanyaan Peneliti:**

*Researcher Question:*

"Bapak sekarang wilayah batas telah di bangun dengan megah, apakah ada perubahan terhadap pendapatan bapak sebagai pedagang di batas ini?"

*"Now that the border area construction is finished and the buildings stand tall, is there any change in your income as a business owner (seller) in this area?"*

**Jawab Informan:**

*Informant answer:*

"Sebagai pedagang kecil, penjualan kami tetap seperti ini. Bangunannya besar, tetapi pembeli yang sering mampir ke kios kami tidak bertambah. Pendapatan kami tetap sama seperti sebelumnya, berjualan kepada orang-orang yang lewat lintas batas saja"

*"As a small business owner (seller), our sales remain unchanged. The building stands tall indeed, but the number of our customers does not increase. Our income remains as it was before, our main customers mostly are people that cross the border"*

**Pertanyaan Peneliti:**

*Researcher Question:*

"Apakah ada dampaknya modernisasi atau pembangunan PLBN Aruk meningkatkan kesejahteraan masyarakat disini, menurut pak Uda?"

*"Mr. Uda, Is there any modernization impact or increase in welfare of the people around the PLBN Aruk?"*

**Jawab Informan:**

*Informant answer:*

"Kalau bangunannya memang bagus sekarang. Orang datang lihat PLBN kagum, bahkan banyak orang dari kabupaten lain seperti Singkwang, dating ke PLBN ini sekedar foto-foto saja. Tapi kalau ditanya ekonomi kami naik atau tidak, saya rasa belum banyak berubah. Dulu sebelum pandemi orang Malaysia sering masuk belanja, sekarang tidak seramai dulu. Pendapatan saya paling naik sedikit waktu ada acara pemerintah saja."

*"The building is looking really good indeed. A lot of people who came to the PLBN were amazed by its sight, many visitors come from neighbouring kabupaten (regencies) and cities, such as Singkawang, just to take photos. But, I were asked whether the economic situation has changed, I would say there is no significant change so far. Before the pandemic, Malaysian tourists often came here to shop, but now it is less crowded. My income only increased slightly when there are government events being held here"*

**Pertanyaan Peneliti:**

*Researcher Question:*

"Apakah ada perubahan akses ekonomi (kesempatan ekonomis, peluang bisnis, dan lain sebagainya) setelah PLBN dibangun?"

*"Has there been any change in economic access (economic opportunities, business opportunities, and so forth) after the construction of the PLBN?"*

**Jawab Informan:**

*Informant answer:*

"Akses jalan memang lebih baik sampai kantor camat Sajingan, tetapi usaha kecil seperti kami masih kesulitan modal. Banyak barang tetap lebih murah dari Malaysia daripada yang dijual disini. Mungkin di sana barang-barang itu merupakan barang yang di subsidi pemerintah Malay. Jadi masyarakat kadang lebih memilih belanja ke sana (toko-toko Malaysia) daripada beli di sini."

*"Road access certainly becomes better to the Sajingan Head District Office, however small businesses like us are still struggling with capital. There are still a lot of cheaper goods from Malaysia compared to those sold locally. Maybe, those goods are subsidized by the Malaysian government, so the people obviously would prefer to shop there (at Malaysian shops) compared to us"*

**Informan 2: Pedagang Lintas Batas Perbatasan**

***#2nd Informant: Cross-border Merchants***

**Kode Informan:** I-02 (Bu Misniati) ***| Informant code:*** *I-02 (Mrs. Misniati)*

**Pekerjaan:** Pedagang Lintas Batas (Indonesia-Malaysia) ***| Occupation:*** *Cross-border Merchant (Indonesia-Malaysia)*

**Tanggal:** 20 Februari 2025 ***| Date:*** *20th Feb, 2025*

**Waktu:** 13.20–14.10 WIB ***| Time:*** *13.20–14.10 GMT+7*

**Lokasi:** Toko Kelontong Aruk ***| Location:*** *Aruk Grocery Store*

**Pertanyaan Peneliti:**

*Researcher Question:*

"Sebagai seorang yang sering bolak-balik Indonesia dan Malaysia untuk berbelanja, Bagaimana Ibu membandingkan kondisi ekonomi Aruk dengan daerah batas Malaysia (Biawak)?"

*"As someone who frequently crosses the Indonesian-Malaysian border to shop, how do you compare the economic conditions of Aruk with the Malaysian border area (Biawak)?"*

**Jawab Informan:**

*Informant answer:*

"Kalau dibandingkan dengan Biawak Malaysia, jauh sekali. Di sana barang lebih lengkap, harga lebih murah, fasilitas kesehatan juga lebih bagus. Banyak warga sini kalau ada keluarga di sana lebih senang belanja ke Malaysia. Harga sembako, gula, sabun bahkan minyak goreng lebih murah di Malay."

*"If I have to compare Aruk with Biawak, the difference is stark. The goods there are far more varied and complete, and cheaper, with better health facilities as well. People with relatives residing in Malaysia prefer to shop in Malaysia. Basic commodities, sugar, soap, and palm frying oil are far cheaper in Malaysia"*

**Pertanyaan Peneliti:**

*Researcher Question:*

"Apakah kondisi barang Malaysia tersebut mempengaruhi konsumsi masyarakat sekitar?"

*"Is this situation affecting people's consumption over here?"*

**Jawab Informan:**

*Informant answer:*

"Iya, sangat pengaruh bu. Masyarakat masih sangat bergantung pada barang dari Malaysia. Bahkan beberapa kebutuhan pokok penting kadang lebih mudah dan murah didapat dari sana, terutama gas kami lebih suka beli di Malaysia, selain murah tersedia setiap saat, tidak seperti barang dari Indonesia… kalaupun ada harus antri."

*"Yes, very much so. People here are still heavily dependent on goods purchased in Malaysia. More than that, basic essential goods are easier to get and cheaper in Malaysia, especially gas (cooking gas), which we much prefer to buy from Malaysian shops, as it is always available unlike from Indonesia, which even if available, we must queue to buy"*

**Informan 3: Tokoh Budaya Prominen Lokal (Suku Dayak) di Desa Sebunga, Aruk**

***#3rd Informant: A Key Local Cultural Figure (Dayak Tribe) at Desa Sebunga, Aruk***

**Kode Informan:** I-03 (Pak Bernadus) ***| Informant code:*** *I-03 (Mr. Bernadus)*

**Pekerjaan:** Kepala Desa Sebunga ***| Occupation:*** *Village Head of Desa Sebunga*

**Tanggal:** 5 Maret 2025 ***| Date:*** *5th Mar, 2025*

**Waktu:** 15.30–16.45 WIB ***| Time:*** *15.30–16.45 GMT+7*

**Lokasi:** Rumah Adat Desa Sebunga ***| Location:*** *Rumah Adat (Traditional tribal house) Desa Sebunga*

**Pertanyaan Peneliti:**

*Researcher Question:*

"Menurut bapak, apakah ada peningkatan kepedulian negara selama pembangunan PLBN ini berdampak pada kehidupan masyarakat?"

*"How do you feel about any change in governmental attention during PLBN construction to the livelihood of the people's lives around here?"*

**Jawab Informan:**

*Informant answer:*

"Kalau kehadiran negara sekarang memang lebih terlihat. Ada PLBN dengan Gedung yang megah dan mulai ada aparat, daerah mulai terlihat lebih maju. Tetapi masyarakat masih menghadapi persoalan ekonomi yang sama, kami masih berjualan seperti biasa. Jadi negara hadir secara fisik, tetapi kehidupan sehari-hari kami tetap sama."

*"I think the government's presence can be seen more nowadays. With the PLBN building standing tall and more governmental officials, it feels like this region is getting more developed. However, the economic situation remains largely unchanged, we are still trading/selling goods as if nothing changed. Therefore, the government may be physically more present but our livelihood is still unchanged."*

**Pertanyaan Peneliti:**

*Researcher Question:*

"Bagaimana persepsi masyarakat atau warga bapak terhadap pembangunan baru-baru ini (PLBN)?"

*"What do you think of the perception of the local communities or the community you lead on the recent development (PLBN)?"*

**Jawab Informan:**

*Informant answer:*

"Masyarakat bangga karena akhirnya wilayah ini diperhatikan pemerintah. Tetapi kebanggaan itu belum sepenuhnya diikuti peningkatan kesejahteraan."

*"The communities are proud because for once, the government is putting its attention to this area. Unfortunately, that pride is not completely followed by a sizable improvement to welfare"*

**Informan 4: Kepala Desa Kaliau**

***#4th Informant: Village Head of Desa Kaliau***

**Kode Informan:** I-04 (Pak Atus) ***| Informant code:*** *I-04 (Mr. Atus)*

**Pekerjaan:** Kepala Desa Kaliau ***| Occupation:*** *Village Head of Desa Kaliau*

**Tanggal:** 12 Maret 2025 ***| Date:*** *12th Mar, 2025*

**Waktu:** 08.00–09.30 WIB ***| Time:*** *08.00–09.30 GMT+7*

**Lokasi:** Rumah Adat Desa Kaliau ***| Location:*** *Rumah Adat (Traditional tribal house) Desa Kaliau*

**Pertanyaan Peneliti:**

*Researcher Question:*

"Bagaimana bentuk partisipasi masyarakat dalam pembangunan perbatasan PLBN?"

*"How did the local community participate in the development of PLBN?"*

**Jawab Informan:**

*Informant answer:*

"Kami sering diundang dalam sosialisasi dan rapat. Namun keputusan strategis biasanya sudah ditetapkan sebelumnya oleh pemerintah pusat. Ruang masyarakat untuk mempengaruhi kebijakan masih terbatas, bahkan untuk penetapan keputusan vital seperti PKSN (Pusat Kawasan Strategis Nasional), kami juga tidak tau… tau-tau PKSN saja."

*"We were often invited to socialization sessions and meetings, however, major strategic decisions were usually already decided by the central government before said meetings. The influence of the local community on policies was strictly limited, even in vital decisions, such as PKSN (National Strategic Area Center, a centralized economic development project aimed to distribute infrastructure and welfare to local border communities) were neither discussed nor communicated to us. All of a sudden, the PKSN had already been established without our knowledge"*

**Pertanyaan Peneliti:**

*Researcher Question:*

"Apakah usulan masyarakat diakomodasi misalnya terkait sektor UMKM, Kesehatan dll?"

*"Were inputs from the local community, such as on MSME, small businesses, healthcare, etc., accommodated by the government?"*

**Jawab Informan:**

*Informant answer:*

"Ada beberapa yang didengar, tetapi kebanyakan hanya menjadi masukan saja, untuk selanjutnya kami tidak tau terhadap usulan tersebut"

*"They listened to some of our inputs/suggestions, but mostly they did not act on it. We don't know what they did with those inputs"*

**Informan 5: Tokoh Adat Melayu**

***#5th Informant: A Key Local Cultural Figure from Melayu Tribe***

**Kode Informan:** I-05 (Pak Rusdin, S.Sos) ***| Informant code:*** *I-05 (Mr. Rusdin, S.Sos)*

**Pekerjaan:** Kepala Desa Sijang ***| Occupation:*** *Village Head of Desa Sijang*

**Tanggal:** 18 Maret 2025 ***| Date:*** *18th Mar, 2025*

**Waktu:** 14.00–15.15 WIB ***| Time:*** *14.00–15.15 GMT+7*

**Lokasi:** Rumah tinggal Pak Rusdin, Desa Sijang ***| Location:*** *Mr. Rusdin's private residence, Desa Sijang*

**Pertanyaan Peneliti:**

*Researcher Question:*

"Menurut Bapak, apakah partisipasi masyarakat bersifat substantif atau prosedural dalam pengembangan PLBN?"

*"What do you think about the community's participation in PLBN development? Was it substantive or procedural?"*

**Jawab Informan:**

*Informant answer:*

"Kalau saya lihat lebih banyak formalitas. Kami hadir dalam rapat, tetapi keputusan penting sudah ditentukan. Jadi partisipasi hanya untuk memenuhi prosedur."

*"To me, much of these participations were just a formality. We were physically present in the meetings, but the key decisions were already pre-determined. Thus, our presence was just to complete the procedures"*

**Informan 6: Pejabat Pengelola Perbatasan Kabupaten Sambas**

***#6th Informant: A Border Government Official***

**Kode Informan:** I-06 (Bu Septiza, S.T., M.Kes) ***| Informant code:*** *I-06 (Mrs. Septiza, S.T., M.Kes)*

**Pekerjaan:** Kepala Badan Pengelola Perbatasan Kabupaten Sambas ***| Occupation:*** *The Head Director of Kabupaten Sambas Border Management Agency*

**Tanggal:** 2 April 2025 ***| Date:*** *2nd Apr, 2025*

**Waktu:** 10.00–11.20 WIB ***| Time:*** *10.00–11.20 GMT+7*

**Pertanyaan Peneliti:**

*Researcher Question:*

Bagaimana hubungan pemerintah pusat dan daerah dalam pengelolaan perbatasan (PLBN)?

*"How is the relationship between the central government and the local government in the development of the PLBN"*

**Jawab Informan:**

*Informant answer:*

"Kebijakan utama berasal dari pusat melalui BNPP dan kementerian terkait. Pemerintah daerah lebih banyak berperan sebagai pelaksana program, kami terlibat pada hal-hal yng bersifat rutin bu, untuk kegiatan sepenuhnya Pemerintah pusat dan Kementrian/Lembaga."

*"The main policies come from the central government through BNPP (National Border Management Agency — Badan Nasional Pengelola Perbatasan) and other relevant ministries. The local government acts as the program executor. We are more involved in routine maintenance tasks. The remaining tasks come from the central government and the ministries."*

**Pertanyaan Peneliti:**

*Researcher Question:*

"Apakah daerah memiliki kewenangan yang cukup dalam proyek ini?"

*"Is the autonomy of the local government sufficient in this project?"*

**Jawab Informan:**

*Informant answer:*

"Masih terbatas. Banyak keputusan strategis tetap berada di tingkat pusat."

*"It is still limited. Many of the strategic decisions were made by the central government"*

**Informan 7: Masyarakat Aruk**

***#7th Informant: Local Aruk People***

**Kode Informan:** I-07 (Pak Atok) ***| Informant code:*** *I-07 (Mr. Atok)*

**Pekerjaan:** Masyarakat sekitar PLBN Aruk ***| Occupation:*** *A local resident at PLBN Aruk*

**Tanggal:** 10 April 2025 ***| Date:*** *10th Apr, 2025*

**Waktu:** 09.40–10.25 WIB ***| Time:*** *09.40–10.25 GMT+7*

**Pertanyaan Peneliti:**

*Researcher Question:*

"Apakah mekanisme Kerjasama antara pemerintah pusat dan daerah dalam pembangunan perbatasan (PLBN) ini yang bapak ketahui?"

*"To your knowledge, are you aware of the cooperation mechanism between the central and local governments in the development of PLBN?"*

**Jawab Informan:**

*Informant answer:*

"Menurut saya Ada koordinasi, tetapi sering kali hanya saat ada kegiatan tertentu, misalnya kegiatan yang sifatnya keagamaan dan kebudayaan saja. Setelah itu jarang ada tindak lanjut yang nyata."

*"All I know, there is a form of coordination to some degree, but much of that only happened during select events, such as religious and cultural events. The rest did not materialize in real life."*

**Informan 8: Pelaku UMKM**

***#8th Informants: Multiple MSME players***

**Kode Informan:** I-08 (Pak Atok (Suku Tionghoa), Pak Sugeng (Suku Jawa), Pak Kralsius (Suku Dayak), dan Ibu Nina (Suku Melayu))

***Informant code****: I- 08 (Mr. Atok (Chinese), Mr. Sugeng (Javanese), Mr. Kralsius (Dayaknese), and Mrs. Nina (Malay), different ethnicities)*

**Pekerjaan:** Pedagang kecil di area sekitar PLBN Aruk ***| Occupation:*** *Small merchants at around PLBN Aruk area*

**Tanggal:** 22 April 2025 ***| Date:*** *22nd Apr, 2025*

**Waktu:** 13.15–14.00 WIB ***| Time:*** *13.15–14.00 GMT+7*

**Pertanyaan Peneliti:**

*Researcher Question:*

"Apakah pembangunan infrastruktur beberapa waktu ini mendorong kemajuan ekonomi lokal?"

*"Does the recent infrastructure development help the local economic condition?"*

**Jawab Informan:**

*Informant answer:*

"Secara Bersama-sama menjawab: Jalan memang bagus sekarang, tetapi usaha masyarakat belum berkembang signifikan. Banyak pemuda masih mencari pekerjaan ke luar daerah."

*"Shared answer: The road is indeed much better now, but the local businesses do not improve significantly. Many youths around are still searching for jobs outside this area"*

**Pertanyaan Peneliti:**

*Researcher Question:*

"Menurut Bapak/Ibu, mengapa demikian?"

*"Why do you think so?"*

**Jawaban:**

"Karena belum banyak investasi atau pabrik yang di bangun disini kebanyakan UMKM seperti kami ini."

*"Because there are not many investments or factories built around this area. Most business players are small merchants (MSME) like us"*

**Informan 9: Tokoh Masyarakat**

***#9th Informant: Local Figure***

**Kode Informan:** I-09 (Pak Obertus, Camat Sajingan Besar) ***| Informant code:*** *I-09 (Mr. Obertus, Head of Sajingan Besar Subdistrict)*

**Pekerjaan:** Camat Sajingan Besar ***| Occupation:*** *Head of Sajingan Besar Subdistrict (Camat)*

**Tanggal:** 14 Mei 2025 ***| Date:*** *14th May, 2025*

**Waktu:** 15.00–16.00 WIB ***| Time:*** *15.00–16.00 GMT+7*

**Pertanyaan:**

*Researcher Question:*

Bagaimana negara menampakkan dirinya dalam konteks kedaulatan di wilayah perbatasan, menurut bapak?

*"In your view, how does the state manifest itself in the context of sovereignty in the border region?"*

**Jawaban:**

*Informant answer:*

"PLBN menjadi simbol paling jelas. Bangunannya besar, bendera negara sangat menonjol, aparat juga banyak. Itu menunjukkan negara hadir di perbatasan."

*"The PLBN is the most visible symbol. The building is grand, the national flag is prominently displayed, and there are many officials present. This shows that the state is present at the border."*

**Pertanyaan:**

*Researcher Question:*

Apakah simbol tersebut berdampak pada kesejahteraan?

*"Does that symbol translate into welfare improvements?"*

**Jawaban:**

*Informant answer:*

"Belum sepenuhnya, Simbol dan kesejahteraan adalah dua hal yang berbeda."

*"Not entirely. Symbols and welfare are two different things."*

**Informan 10: Masyarakat Desa Sebunga**

***#10th Informant: Community Member, Desa Sebunga***

**Kode Informan:** I-10 (Wati, Tokoh Perempuan Desa Sebunga) ***| Informant code:*** *I-10 (Mrs. Wati, Women's Figure of Desa Sebunga)*

**Pekerjaan/Status:** Tokoh Perempuan Desa Sebunga ***| Role:*** *Women's Community Leader, Desa Sebunga*

**Tanggal:** 28 Mei 2025 ***| Date:*** *28th May, 2025*

**Waktu:** 10.15–11.05 WIB ***| Time:*** *10.15–11.05 GMT+7*

**Pertanyaan:**

*Researcher Question:*

Bagaimana Ibu memaknai pembangunan PLBN Aruk?

*"How do you perceive the development of PLBN Aruk?"*

**Jawaban:**

*Informant answer:*

"Kalau dilihat memang bagus dan membanggakan. Tetapi bagi masyarakat kecil yang penting adalah pekerjaan, pendapatan, dan harga kebutuhan pokok. Itu yang masih menjadi masalah."

*"Looking at it, the development is indeed impressive and something to be proud of. However, for ordinary people, what matters most is employment, income, and the price of basic goods. Those are still the main problems."*

**Pertanyaan:**

*Researcher Question:*

Apakah dalam pembangunan PLBN tersebut ibu pernah dimintai pendapat dan sebagai tokoh perempuan apakah ibu mengungkapkan apa yang diinginkan dalam pembangunan perbatasan ini?

*"During the PLBN development process, were you ever consulted for your opinion? And as a women's community leader, were you able to voice what your community needs during this border development?"*

**Jawaban:**

*Informant answer:*

"Sebagai kelompok perempuan, kami sering diundang untuk berkumpul ketika ada kegiatan sosialisasi. Tetapi itu hanya berupa pengumuman, bukan menanyakan apa yang sebenarnya kami butuhkan di perbatasan ini"

*"As a women's group, we were often invited to gather during socialization events. However, those were merely announcements. They were not asking us what we actually need at this border."*

**INFORMAN 11: Kepala Bagian Pengelolaan Perbatasan Kabupaten Sambas**

***#11th Informant: Head of Border Management Division, Kabupaten Sambas***

**Kode Informan:** I-11

**Jabatan:** Kepala Bagian Pengelolaan Perbatasan Kabupaten Sambas ***| Position:*** *Head of the Border Management Division, Kabupaten Sambas*

**Tanggal:** 17 Juni 2025 ***| Date:*** *17th Jun, 2025*

**Waktu:** 09.00–10.45 WIB ***| Time:*** *09.00–10.45 GMT+7*

**Lokasi:** Kantor Bupati Sambas ***| Location:*** *Sambas Regency Government Office (Kantor Bupati Sambas)*

**Pertanyaan 1:**

*Researcher Question 1:*

Bagaimana Bapak melihat dampak pembangunan PLBN Aruk terhadap masyarakat perbatasan?

*"How do you view the impact of the PLBN Aruk development on the border communities?"*

**Jawaban:**

*Informant answer:*

"Pembangunan PLBN Aruk merupakan salah satu bentuk komitmen pemerintah pusat dalam memperkuat kawasan perbatasan sebagai beranda depan negara. Dari sisi infrastruktur, kita melihat perubahan yang cukup signifikan dibandingkan kondisi sebelum tahun 2017. Jalan akses semakin baik, fasilitas pelayanan lintas batas meningkat, dan citra kawasan perbatasan menjadi lebih representatif."

*"The PLBN Aruk development is one form of the central government's commitment to strengthening the border region as the nation's front porch. In terms of infrastructure, we can see quite significant changes compared to the conditions before 2017. Road access has improved, cross-border service facilities have increased, and the image of the border area has become more representative."*

**Pertanyaan:**

*Researcher Question:*

Apakah perubahan tersebut telah berdampak pada peningkatan kesejahteraan masyarakat?

*"Has this change impacted the improvement of community welfare?"*

**Jawaban:**

*Informant answer:*

"Kalau berbicara kesejahteraan, tentu prosesnya tidak bisa instan. Infrastruktur merupakan prasyarat awal. Namun kami mengakui bahwa peningkatan kesejahteraan masyarakat belum sepenuhnya sejalan dengan pembangunan fisik yang telah dilakukan."

*"When it comes to welfare, the process cannot happen overnight. Infrastructure is just the first prerequisite. However, we acknowledge that the improvement in community welfare has not yet fully kept pace with the physical development that has been carried out."*

**Pertanyaan 2:**

*Researcher Question 2:*

Bagaimana hubungan pemerintah pusat dan pemerintah daerah dalam pengelolaan kawasan perbatasan?

*"How is the relationship between the central government and the local government in managing the border area?"*

**Jawaban:**

*Informant answer:*

"Sebagian besar kebijakan strategis berada pada pemerintah pusat melalui BNPP dan kementerian terkait. Pemerintah daerah lebih banyak berperan dalam koordinasi, fasilitasi, dan sinkronisasi program, dengan kata lain kami juga tidak mengetahui rencana pembangunan aqpapun yangbterjadi di PLBN ini. Dengan kata lain bahwa Program-program ini berasal dari pemerintah pusat. Kami di tingkat daerah hanya bertugas melaksanakannya"

*"Most of the strategic policies rest with the central government through BNPP and relevant ministries. The local government plays more of a role in coordination, facilitation, and program synchronization. In other words, we were also unaware of any development plans taking place at this PLBN. To put it plainly, these programs come from the central government. We at the local level are only tasked with implementing them."*

**Pertanyaan:**

*Researcher Question:*

Apakah pemerintah daerah memiliki ruang yang cukup untuk menentukan arah pembangunan?

*"Does the local government have sufficient room to determine the direction of development?"*

**Jawaban:**

*Informant answer:*

"Ruang itu ada, tetapi dalam praktiknya masih terbatas. Program-program besar biasanya telah ditentukan melalui mekanisme nasional sehingga daerah lebih banyak menyesuaikan."

*"The space exists, but in practice it is still limited. Large-scale programs are usually determined through national mechanisms, so the local government mostly adapts to what has been set."*

**Pertanyaan 3:**

*Researcher Question 3:*

Bagaimana keterlibatan masyarakat dalam pembangunan kawasan perbatasan?

*"How is the community's involvement in the development of the border area?"*

**Jawaban:**

*Informant answer:*

"Masyarakat dilibatkan melalui musrenbang, konsultasi publik, dan forum koordinasi lainnya. Akan tetapi memang tidak semua aspirasi dapat diakomodasi karena harus disesuaikan dengan prioritas pembangunan nasional."

*"The community is involved through musrenbang (village development planning meetings), public consultations, and other coordination forums. However, not all aspirations can be accommodated because they must be aligned with national development priorities."*

**Pertanyaan:**

*Researcher Question:*

Apakah masyarakat memiliki pengaruh terhadap keputusan strategis?

*"Does the community have influence over strategic decisions?"*

**Jawaban:**

*Informant answer:*

"Secara formal masyarakat mempunyai ruang untuk menyampaikan aspirasi. Namun keputusan akhir tetap berada pada pemerintah sesuai regulasi yang berlaku."

*"Formally, the community has room to express their aspirations. However, the final decision still rests with the government in accordance with applicable regulations."*

**Catatan Peneliti:**

*Researcher's Note:*

Pada saat wawancara, informan beberapa kali menegaskan bahwa:

*During the interview, the informant repeatedly emphasized that:*

"Perbatasan merupakan kawasan strategis nasional sehingga banyak keputusan bersifat top-down."

*"The border is a national strategic area, therefore many decisions are top-down in nature."*

Pernyataan tersebut menunjukkan kecenderungan sentralisasi kewenangan dalam pengelolaan perbatasan.

*This statement reflects a tendency toward centralization of authority in border management.*

**INFORMAN 12: Pejabat BNPPD Provinsi Kalimantan Barat**

***#12th Informant: Official of BNPPD (Regional Border Management Agency), West Kalimantan Province***

**Kode Informan:** I-12

**Jabatan:** Analis Kebijakan Ahli Madya Bidang Pengembangan Kawasan Perbatasan Provinsi Kalimantan Barat ***| Position:*** *Intermediate Policy Analyst for Border Area Development, West Kalimantan Province*

**Tanggal:** 3 Juli 2025 ***| Date:*** *3rd Jul, 2025*

**Waktu:** 13.30–15.30 WIB ***| Time:*** *13.30–15.30 GMT+7*

**Lokasi:** Kantor BNPPD Provinsi Kalimantan Barat, Pontianak ***| Location:*** *BNPPD Office, West Kalimantan Province, Pontianak*

**Pertanyaan 1:**

*Researcher Question 1:*

Apa tujuan utama pembangunan PLBN Aruk menurut pemerintah?

*"What is the main purpose of the PLBN Aruk development according to the government?"*

**Jawaban:**

*Informant answer:*

"PLBN tidak hanya berfungsi sebagai pintu keluar masuk negara. PLBN juga menjadi instrumen strategis untuk menunjukkan kehadiran negara di wilayah perbatasan sekaligus meningkatkan pelayanan publik dan mendorong pertumbuhan ekonomi kawasan."

*"The PLBN does not only function as a national entry and exit point. The PLBN also serves as a strategic instrument to demonstrate the state's presence in the border region while simultaneously improving public services and driving regional economic growth."*

**Pertanyaan:**

*Researcher Question:*

Mengapa pembangunan PLBN lebih menonjol pada aspek fisik?

*"Why does PLBN development appear to be more prominent in its physical aspects?"*

**Jawaban:**

*Informant answer:*

"Pembangunan fisik menjadi tahap awal karena kondisi perbatasan sebelumnya sangat tertinggal. Negara perlu menunjukkan kapasitasnya terlebih dahulu melalui pembangunan infrastruktur yang memadai, namun demikian keterlibatan daerah dalam hal ini provinsi melalui BNPPD sangat rendah, cenderung dominasi pemerintah pusat dalam hal ini."

*"Physical development was the first stage because the border area was previously far behind. The state needed to first demonstrate its capacity through adequate infrastructure development. However, regional involvement, in this case the province through BNPPD, was very low; there was a clear tendency toward central government dominance in this regard."*

**Pertanyaan 2:**

*Researcher Question 2:*

Bagaimana Bapak melihat kritik bahwa pembangunan perbatasan lebih simbolik daripada substantif?

*"How do you respond to the criticism that border development is more symbolic than substantive?"*

**Jawaban:**

*Informant answer:*

"Kami memahami adanya kritik tersebut. Memang masyarakat sering membandingkan pembangunan fisik yang terlihat dengan dampak ekonomi yang belum sepenuhnya dirasakan. Namun pemerintah memandang pembangunan sebagai proses bertahap."

*"We understand that criticism. Indeed, communities often compare the visible physical development with the economic impact that has not yet been fully felt. However, the government views development as a gradual process."*

**Pertanyaan:**

*Researcher Question:*

Apakah pembangunan ekonomi lokal berjalan secepat pembangunan infrastruktur?

*"Is local economic development progressing as fast as infrastructure development?"*

**Jawaban:**

*Informant answer:*

"Belum. Pembangunan ekonomi memerlukan ekosistem yang lebih kompleks seperti investasi, pasar, sumber daya manusia, dan aktivitas perdagangan yang berkelanjutan."

*"Not yet. Economic development requires a more complex ecosystem such as investment, markets, human resources, and sustainable trade activities."*

**Pertanyaan 3:**

*Researcher Question 3:*

Bagaimana bentuk kolaborasi antara pemerintah pusat, provinsi, kabupaten, dan masyarakat?

*"What form does collaboration take between the central government, provinces, regencies, and communities?"*

**Jawaban:**

*Informant answer:*

"Secara kelembagaan koordinasi berjalan melalui berbagai forum. Kami rutin melakukan rapat koordinasi lintas sektor dan penyusunan program bersama, namun demikian draf utuh terhadap perencanaan pembangunannya pemerintah pusat yang lebih berperan. Kalua boleh saya simpulkan bu bahwa Kolaborasi memang ada di atas kertas, tetapi arah kebijakan strategis sepenuhnya ditarik kembali ke Jakarta. Wilayah ini praktis tidak memiliki ruang diskresi untuk mengadaptasi program ke konteks lokal"

*"Institutionally, coordination runs through various forums. We regularly hold cross-sector coordination meetings and joint program planning. However, the central government plays a more dominant role in drafting the full development plans. If I may summarize: collaboration exists on paper, but the strategic policy direction is entirely pulled back to Jakarta. This region practically has no discretionary space to adapt programs to the local context."*

**Pertanyaan:**

*Researcher Question:*

Kalua begitu keadaannya, Apakah kolaborasi tersebut efektif?

*"Given that situation, is the collaboration effective?"*

**Jawaban:**

*Informant answer:*

"Secara administratif berjalan baik. Namun dalam implementasi masih terdapat kendala seperti tumpang tindih kewenangan, keterbatasan anggaran terutama di propinsi apalagi di kabuupaten Sambas sendiri , dan perbedaan prioritas antarinstansi."

*"Administratively, the entire operation are going smoothly. However, implementation wise, there are still obstacles such as overlapping authority, budget constraints, especially at the provincial level and even more so in Kabupaten Sambas itself, and differing priorities between government institutions."*

**Pertanyaan 4:**

*Researcher Question 4:*

Bagaimana posisi masyarakat dalam proses pembangunan perbatasan?

*"What is the community's position in the border development process?"*

**Jawaban:**

*Informant answer:*

"Masyarakat merupakan penerima manfaat utama pembangunan. Oleh karena itu keterlibatan mereka sangat penting."

*"The community is the primary beneficiary of development. Therefore, their involvement is very important."*

**Pertanyaan:**

*Researcher Question:*

Apakah masyarakat ikut menentukan agenda pembangunan?

*"Does the community participate in determining the development agenda?"*

**Jawaban:**

*Informant answer:*

"Masyarakat dapat memberikan masukan melalui forum-forum yang tersedia. Namun karena pembangunan perbatasan merupakan bagian dari kebijakan nasional atau pemerintah pusat, tentu ada arah strategis yang sudah ditetapkan pemerintah."

*"The community can provide input through available forums. However, since border development is part of national or central government policy, there is naturally a strategic direction that has already been set by the government."*

**Pertanyaan 5:**

*Researcher Question 5:*

Bagaimana Bapak memaknai keberadaan PLBN Aruk dalam konteks kedaulatan negara?

*"How do you interpret the existence of PLBN Aruk in the context of state sovereignty?"*

**Jawaban:**

*Informant answer:*

"PLBN merupakan representasi negara di wilayah terdepan. Ketika masyarakat dan warga negara asing memasuki wilayah Indonesia, PLBN menjadi simbol kehadiran, kewibawaan, dan kapasitas negara."

*"The PLBN is the state's representation in the frontline territory. When community members and foreign nationals enter Indonesian territory, the PLBN becomes a symbol of the state's presence, authority, and capacity."*

**Pertanyaan:**

*Researcher Question:*

Apakah simbol tersebut cukup untuk membangun kesejahteraan?

*"Is that symbol sufficient to build welfare?"*

**Jawaban:**

*Informant answer:*

"Tidak cukup. Simbol harus diikuti program ekonomi dan sosial yang berkelanjutan agar manfaat pembangunan benar-benar dirasakan masyarakat."

*"Not sufficient. Symbols must be followed by sustainable economic and social programs so that the benefits of development can be felt by the community."*

**MATRIKS TRANSKRIP WAWANCARA DENGAN BERBAGI SUMBER DI ARUK**

| **No** | **Informan** | **Jabatan/Status** | **Kutipan Kunci** | **Kode** | **Sub Tema** | **Tema Utama** |
| --- | --- | --- | --- | --- | --- | --- |
| 1 | Pak Uda | Pelaku UMKM Aruk | "Bangunannya memang bagus sekarang, tetapi ekonomi kami belum banyak berubah." | Visible Infrastructure | Dampak ekonomi terbatas | Modernisasi Perbatasan |
| 2 | Pak Uda | "Pendapatan saya naik sedikit waktu ada acara pemerintah saja." | Temporary Income Effect | Manfaat ekonomi tidak berkelanjutan | Modernisasi Perbatasan |
| 3 | Misniati | Pedagang Perbatasan | "Barang di Malaysia lebih murah dan lebih lengkap." | Border Consumption Gap | Disparitas ekonomi | Ketergantungan Lintas Batas |
| 4 | Misniati | "Masyarakat masih bergantung pada barang Malaysia." | Economic Dependency | Ketergantungan ekonomi | Ketergantungan Lintas Batas |
| 5 | Bernadus | Kepala Desa Sebunga | "Negara hadir secara fisik tetapi manfaat ekonominya belum terasa besar." | State Visibility | Kehadiran negara simbolik | Performative Sovereignty |
| 6 | Bernadus | "Masyarakat bangga karena wilayah ini diperhatikan." | Symbolic Recognition | Kebanggaan simbolik | Performative Sovereignty |
| 7 | Atus | Kepala Desa Kaliau | "Keputusan strategis biasanya sudah ditetapkan sebelumnya." | Top Down Planning | Partisipasi terbatas | Symbolic Participation |
| 8 | "Kebanyakan hanya menjadi masukan saja." | Consultative Participation | Tokenisme | Symbolic Participation |
| 9 | Rusdin | Tokoh Adat Melayu | "Partisipasi hanya untuk memenuhi prosedur." | Procedural Participation | Formalitas partisipasi | Symbolic Participation |
| 10 | Septiza, S.T., M.Kes | Kepala Badan Pengelola Perbatasan Sambas | "Kebijakan utama berasal dari pusat." | Centralized Governance | Dominasi pusat | Recentralization |
| 11 | "Daerah lebih banyak sebagai pelaksana program." | Limited Local Authority | Keterbatasan daerah | Recentralization |
| 12 | Atok | Masyarakat Aruk | "Koordinasi ada, tetapi jarang ada tindak lanjut." | Weak Collaboration | Kolaborasi tidak efektif | Collaborative Governance |
| 13 | Sugeng | Pelaku UMKM | "Usaha masyarakat belum berkembang signifikan." | Economic Stagnation | Transformasi ekonomi lemah | Infrastruktur dan Ekonomi |
| 14 | Kralsius | "Belum banyak investasi yang masuk." | Investment Constraint | Hambatan ekonomi lokal | Infrastruktur dan Ekonomi |
| 15 | Nina | "Pasar lokal masih kecil." | Market Limitation | Keterbatasan pasar | Infrastruktur dan Ekonomi |
| 16 | Obertus | Camat Sajingan Besar | "PLBN menjadi simbol paling jelas." | State Symbolism | Simbol kedaulatan | Performative Sovereignty |
| 17 | "Simbol dan kesejahteraan adalah dua hal berbeda." | Symbol-Welfare Gap | Kesenjangan pembangunan | Performative Sovereignty |
| 18 | Wati | Tokoh Perempuan Sebunga | "Yang penting pekerjaan dan pendapatan." | Welfare Priority | Kebutuhan substantif | Welfare Gap |
| 19 | "Manfaat belum sebesar yang diharapkan." | Welfare Deficit | Kesenjangan manfaat | Welfare Gap |
| 20 | Staf Bagian Perbatasan Sambas | Pemerintah Kabupaten Sambas | "Peningkatan kesejahteraan belum sejalan dengan pembangunan fisik." | Development Gap | Kesenjangan pembangunan | Symbolic Modernization |
| 21 | "Kami juga tidak mengetahui rencana pembangunan di PLBN." | Information Asymmetry | Sentralisasi kebijakan | Recentralization |
| 22 | "Perbatasan merupakan kawasan strategis nasional." | National Strategic Area | Centralized Legitimation | State-Centric Governance |
| 23 | Pejabat BNPPD Kalbar | BNPPD Provinsi Kalbar | "PLBN menjadi instrumen strategis menunjukkan kehadiran negara." | Sovereignty Display | Representasi negara | Performative Sovereignty |
| 24 | "Keterlibatan daerah sangat rendah." | Provincial Marginalization | Dominasi pusat | Recentralization |
| 25 | "Pembangunan ekonomi tidak secepat pembangunan infrastruktur." | Uneven Development | Ketimpangan pembangunan | Symbolic Modernization |
| 26 | "Draf perencanaan pembangunan lebih banyak ditentukan pusat." | Central Planning | State-Centric Planning | State-Centric Governance |
| 27 | "Terdapat tumpang tindih kewenangan." | Institutional Fragmentation | Kolaborasi lemah | Collaborative Governance |
| 28 | "Masyarakat hanya memberikan masukan." | Limited Agency | Agensi lokal terbatas | Symbolic Participation |
| 29 | "PLBN menjadi simbol kehadiran dan kewibawaan negara." | State Performance | Kedaulatan performatif | Performative Sovereignty |
| 30 | "Simbol harus diikuti program ekonomi." | Welfare Requirement | Kebutuhan pembangunan substantif | Welfare Gap |

**TRANSCRIPT MATRIX OF INTERVIEWS FROM ALL DATA SOURCES IN ARUK**

| **No** | **Informant** | **Occupation** | **Key Quote** | **Code** | **Subtheme** | **Main Theme** |
| --- | --- | --- | --- | --- | --- | --- |
| 1 | Mr Uda | *MSME (Micro, Small, and Medium Enterprise) owner* | “The building stands tall and grand but not much has changed economically” | Visible Infrastructure | Limited Economic Impact | Borderland Modernization |
| 2 | “My income only increases slightly during occasional government events” | Temporary Income Effect | Unsustainable Economic Benefit | Borderland Modernization |
| 3 | Mrs Misniati | Borderland Merchant | "The goods in Malaysia are more varied and complete." | Border Consumption Gap | Economic Disparity | Cross-border Dependency |
| 4 | "Local people are still dependen ton Malaysian-produced goods." | Economic Dependency | Economic Dependency | Cross-border Dependency |
| 5 | Mr Bernadus | Village Head of Desa Sebunga | “The nation is present physically but not economically” | State Visibility | Simbolic Presence of the Government | Performative Sovereignty |
| 6 | “The people are proud that the government is finally putting its attention” | Symbolic Recognition | Symbolic Pride | Performative Sovereignty |
| 7 | Mr Atus | Village Head of Desa Kaliau | “Strategic decisions are usually pre-determined” | Top Down Planning | Limited Participation | Symbolic Participation |
| 8 | “Most inputs were not acted on” | Consultative Participation | Tokenism | Symbolic Participation |
| 9 | Mr Rusdin | Malay Key Cultural Figure | "Pariticipation is a way to fulfill the procedure" | Procedural Participation | Formality Participation | Symbolic Participation |
| 10 | Mrs. Septiza, S.T., M.Kes | Head Director of Kabupaten Sambas Border Management Agency | "The central government decided the main decisions" | Centralized Governance | Central Dominance | Recentralization |
| 11 | "The local government act as the plan executor" | Limited Local Authority | Limited Local Authority | Recentralization |
| 12 | Mr Atok | Local Aruk Resident | "We are aware of collaboration, but many times it failed to materialize" | Weak Collaboration | Ineffective Collaboration | Collaborative Governance |
| 13 | Mr Sugeng | *MSME (Micro, Small, and Medium Enterprise) owner* | "Local businesses have yet to significantly be developed"  "There is not many investors coming in"  "Local markets are small." | Economic Stagnation | Weak Economical Transformation | Infrastructure and Economy |
| CO | Mr Kralsius | Investment Constraint | Local Economic Obstacle | Infrastructure and Economy |
| 15 | Mrs Nina | Market Limitation | Market Limitation | Infrastructure and Economy |
| 16 | Mr Obertus | Head District of Sajingan Besar | "PLBN act as a clear symbol of sovereignity" | State Symbolism | State Symbolism | Performative Sovereignty |
| 17 | "Symbol and welfare are two distinct concepts" | Symbol-Welfare Gap | Development Inequality | Performative Sovereignty |
| 18 | Mrs Wati | Key Female Figure at Sebunga | "We prioritize jobs and incomes" | Welfare Priority | Substantive Needs | Welfare Gap |
| 19 | "The positive impact has yet to be sizeable enough" | Welfare Deficit | Inequality of Benefit | Welfare Gap |
| 20 | Sambas Borderland Official | Sambas Regency Local Government | "The development of welfare does not go hand-in-hand with infrastructure development” | Development Gap | Development Inequality | Symbolic Modernization |
| 21 | "We had no clue of the plan to build the PLBN" | Information Asymmetry | Centralized Policy | Recentralization |
| 22 | "The borderland is this country’s strategic area“ | National Strategic Area | Centralization Legitimation | State-Centric Governance |
| 23 | BNPPD (National Border Management Agency ) official | BNPPD West Borneo Province | “PLBN acts as a strategic instrument to prove the prescence of this nation” | Sovereignty Display | National Representation | Performative Sovereignty |
| 24 | "The local government participation is too low." | Provincial Marginalization | Central Dominance | Recentralization |
| 25 | "The economic growth is not as fast as the recent development on infrastructures." | Uneven Development | Development Inequality | Symbolic Modernization |
| 26 | “The blueprint of the construction was determined mostly by the central government” | Central Planning | State-Centric Planning | State-Centric Governance |
| 27 | "There is a clear authority overlapping" | Institutional Fragmentation | Weak Collaboration | Collaborative Governance |
| 28 | "The people are only allowed to give inputs" | Limited Agency | Limited Local Agency | Symbolic Participation |
| 29 | “PLBN becomes the symbol of the sovereignity and presence of the state” | State Performance | Performative Sovereignty | Performative Sovereignty |
| 30 | “The symbol must also followed by economic programs” | Welfare Requirement | Substantive Development Needs | Welfare Gap |

**MATRIK HASIL ANALISIS TENTANG KEBIJAKAN PEMBANGUNAN PLBN ARUK (JURNAL)**

| **No** | **Fokus Penelitian** | **Pertanyaan Penelitian** | **Indikator Empiris** | **Sumber Data Primer** | **Teknik Pengumpulan** | **Temuan Kunci (Evidence Lapangan)** |
| --- | --- | --- | --- | --- | --- | --- |
| 1 | **Dampak Modernisasi Perbatasan (PLBN)** | Bagaimana modernisasi PLBN Aruk mempengaruhi kesejahteraan masyarakat lokal? | - Perubahan pendapatan  - Akses ekonomi  - Aktivitas perdagangan | UMKM (pak Uda), masyarakat lokal, pedagang lintas batas | Wawancara, observasi | Dampak ekonomi **terbatas dan tidak merata**; masyarakat masih bergantung pada ekonomi informal |
| 2 | **Disparitas Lintas Batas** | Bagaimana masyarakat membandingkan kondisi ekonomi Aruk dengan Malaysia? | - Harga barang  - Akses fasilitas  - Mobilitas lintas batas | Masyarakat, pelaku usaha (Misniati) | Wawancara | Malaysia dianggap **lebih maju dan stabil**, memicu ketergantungan konsumsi ke luar negeri |
| 3 | **State Visibility vs Welfare** | Apakah peningkatan kehadiran negara berdampak pada kehidupan sehari-hari masyarakat? | - Persepsi terhadap negara  - Kehadiran aparat  - Infrastruktur | Masyarakat, tokoh lokal (Bernadus Tokoh Dayak di desa sebunga) | Wawancara, observasi | Negara **lebih terlihat secara fisik**, tetapi **tidak signifikan dalam kesejahteraan** |
| 4 | **Partisipasi Masyarakat** | Bagaimana bentuk partisipasi masyarakat dalam pembangunan perbatasan? | - Keterlibatan dalam rapat  - Pengaruh terhadap keputusan | Kepala desa Kaliau (Atus) , tokoh adat Melayu (Rusdin), Tokoh Perempuan desa Sebunga(wati) | Wawancara | Partisipasi bersifat **simbolik (tokenistik)**, keputusan tetap top-down |
| 5 | **Kualitas Partisipasi** | Apakah partisipasi bersifat substantif atau hanya prosedural? | - Timing partisipasi - Akses terhadap keputusan | Informan lintas aktor (atok, sugeng, Kralsius dan nina) | Wawancara | Partisipasi terjadi **setelah keputusan dibuat**, hanya formalitas |
| 6 | **Relasi Pusat–Daerah** | Bagaimana dinamika hubungan antara pemerintah pusat dan daerah dalam pengelolaan perbatasan? | - Otoritas perencanaan - Distribusi kewenangan | Pemerintah daerah (kabag Pengelola Perbatasan Kab. Sambas), BNPP propinsi | Wawancara, dokumen | Terjadi **recentralization**, daerah hanya sebagai pelaksana |
| 7 | **Efektivitas Collaborative Governance** | Apakah mekanisme kolaboratif berjalan efektif? | - Koordinasi antar aktor  - Sinergi kebijakan | Pemerintah Kabupaten, propinsi, masyarakat | Wawancara | Kolaborasi **formal ada**, tetapi **tidak efektif secara praktik** |
| 8 | **Peran Infrastruktur** | Apakah pembangunan infrastruktur mampu mendorong transformasi ekonomi lokal? | - Konektivitas  - Pertumbuhan usaha lokal | UMKM, observasi lapangan | Observasi, wawancara | Infrastruktur menghasilkan **“visible development” tanpa transformasi ekonomi** |
| 9 | **Performative Sovereignty** | Bagaimana negara “memperagakan” kedaulatan di perbatasan? | - Simbol negara  - Arsitektur PLBN - Praktik administratif | Observasi, dokumen, masyarakat | Observasi, wawancara | Kedaulatan ditampilkan melalui **simbol, bangunan, dan aparat (performative)** |
| 10 | **Gap Simbolik vs Substantif** | Mengapa terjadi kesenjangan antara simbol pembangunan dan realitas sosial-ekonomi? | - Distribusi manfaat  - Akses ekonomi  - Agency lokal | Semua informan | Analisis tematik | Terjadi **“symbolic surplus without distributive depth”** |
| 11 | **Ekonomi Lokal** | Bagaimana strategi bertahan masyarakat dalam kondisi keterbatasan ekonomi? | - Praktik informal - Perdagangan kecil | Pedagang, masyarakat | Wawancara | Ekonomi lokal bertumpu pada **aktivitas informal lintas batas** |
| 12 | **Agensi Lokal** | Sejauh mana masyarakat memiliki ruang untuk menentukan arah pembangunan di tanah mereka sendiri? | - Keterlibatan dalam kebijakan  - Otonomi lokal | Tokoh lokal Adat dayak, Melayu, dan pemerintah desa Sebunga | Wawancara | Agensi lokal **terbatas oleh struktur sentralistik** |
| 13 | **Makna Modernisasi bagi Masyarakat** | Bagaimana masyarakat memaknai pembangunan PLBN? | - Persepsi simbolik vs manfaat nyata | Masyarakat | Wawancara | Modernisasi dianggap **“bagus secara tampilan, lemah secara manfaat”** |
| 14 | **Outcome Kebijakan** | **Apakah hasil pembangunan lebih dominan simbolik atau substantif?** | **- Visibility vs welfare** | **Sintesis semua data** | **Analisis** | **Dominan pada symbolic outcomes (visibility, control)** |

**ANALYSIS MATRIX ON PLBN ARUK DEVELOPMENT POLICY**

| **No** | **Research Focus** | **Research Question** | **Empirical Indicator** | **Primary Data Source** | **Sampling Method** | **Key Findings (Field Evidence)** |
| --- | --- | --- | --- | --- | --- | --- |
| 1 | **Impact of Borderland Modernization (PLBN)** | “How does the PLBN Aruk modernization influence the welfare of the local community?” | - Income gain  - Economic access  - Trade activity | MSME owner (Mr Uda), locals, cross-border merchant (Mrs Misniati) | Interview, observasi | The economic impact is **limited and inequal.** The community is still dependen to informal economy |
| 2 | **Cross Border Disparity** | “How do the people of the local community compare the economy in Aruk to the Malaysian side?” | - Goods price  - Facility access  - Cross-border mobility | Locals, cross-border merchant (Mrs Misniati) | Interview | Malaysia is seen to be **more stable and developed**, causing foreign dependence for consumer goods |
| 3 | **State Visibility vs Welfare** | “Does the increase of national presence in the area affect the livelihood of the people?” | - Perception towards government  - Government official presence  - Infrastructure | Locals, Key cultural figure (Bernadus, Village Head of Desa Sebunga) | Interview, observation, | State presence is **physically more apparent, but not significant in welfare process** |
| 4 | **Community Participation** | “What form does local community participation take during the development of the border?” | - Meeting pariticipation  - Influence in decision | Village head of Kaliau (Mr Atus), key Malay ethnic group figure (Mr Rusdin), Key woman figure (Mrs Wati) | Interview | Participation becomes **symbolic (tokenistic),** decisions remain top-down |
| 5 | **Quality of the Participation** | “Is the participation substantive or only procedural?” | - Participation timing  - Access to decision | Cross-actor informants (Mr Atok, Mr Sugeng, Mr Kralsius, and Mrs Nina) | Interview | Participation happen **after the actual decision has been made,** hence limited to **formality** |
| 6 | **Relation with Central Government** | “How is the dynamics between the central and local governments in the managerial process of the border?” | - Planning authority  - Authority redistribution | Local government (BNPP Sambas), West Borneo BNPPD | Interview, document | **Recentralization** happen and the local government acts as mere plan executor |
| 7 | **Collaborative Governance Effectiveness** | “Does the collaboration run effectively?” | - Inter-actor coordination  - Policy sinergy | Local regency and province government, locals | Interview | **Formal collaboration exist, but impractical** |
| 8 | **Role of the Infrastructure** | “Is the infrastructure development capable of initiating local economic transformation?” | - Connectivity  - Local business growth | MSME actors, field observatio | Interview, observation, | Infrastructure **gives birth to “visible development” without economic transformation** |
| 9 | **Performative Sovereignty** | “How does the government “act” sovereignity in the borderland?” | - Nation symbolism  - PLBN architecture  - Administrative practice | Observation, documents, local interviews | Interview, observation, | Sovereignity is **demonstrated through symbols, grand buildings, and the presence of government officials (perfomrative)** |
| 10 | **Symbolic vs. Substantive Gap** | “Why does the disparity between development symbolism and socio-economic reality at the border happen?” | - Benefit distribution  - Economic access  - Local agency | All informants | Thematic analysis | **“Symbolic surplus without distributive depth”** happened |
| 11 | **Local Economy** | “How does local community survive economic limitations?” | - Informal practice  - Small trades | Seller, locals | Interview | Local economy depends on **informal cross-border activity** |
| 12 | **Local Agency** | “To what extend does the local community have the autonomy to decide the development in their own land?” | - Participation in policy  - Local autonomy | Key Dayaknese cultural figures and Desa Sebunga governance body | Interview | Local agency is limited by **centralistic structures** |
| 13 | **Local Community Perspective on Modernization** | “How does local community see the development of PLBN?” | - Symbolic perception vs. Real-life benefit | Locals | Interview | Modernization is seen as a “**good display, but lacking in actual benefits”** |
| 14 | **Policy Outcome** | “Is the result of the development more symbolic rather than substantive?” | - Visibility vs welfare | Data analysis and synthesis | Analysis | Dominant to symbolic outcomes (visibility and control) |
